# Supplementary material
Source: PubMed Central journal article supplement (PMC10370421)
Supplement: NIHMS1919117-supplement-supplemental_figures.pdf [file NIHMS1919117-supplement-supplemental_figures.pdf]

Supplementary Materials for

**An ACE inhibitor reduces bactericidal activity of human neutrophils in vitro and impairs mouse neutrophil activity in vivo**

Duo-Yao Cao *et al.*

Corresponding author: Zakir Khan, zakir.khan@csmc.edu

*Sci. Transl. Med.* **13**, eabj2138 (2021)

DOI: 10.1126/scitranslmed.abj2138

**The PDF file includes:**

Figs. S1 to S8  
Tables S1 to S5

**Other Supplementary Material for this manuscript includes the following:**

Data file S1

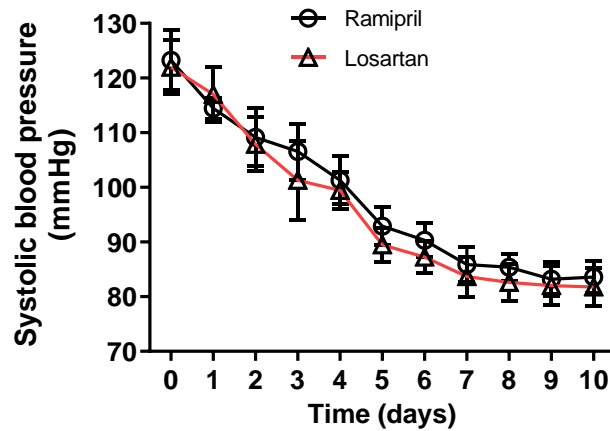

**Fig. S1. Blood pressure was reduced as in mice treated with ramipril or losartan.** Both ramipril and losartan were effective at the concentrations used as demonstrated by a reduction of about 35 mmHg of systolic blood pressure after 7 days, and then it is maintained at a steady state (n=10 per group). Blood pressure was measured by the tail-cuff method.

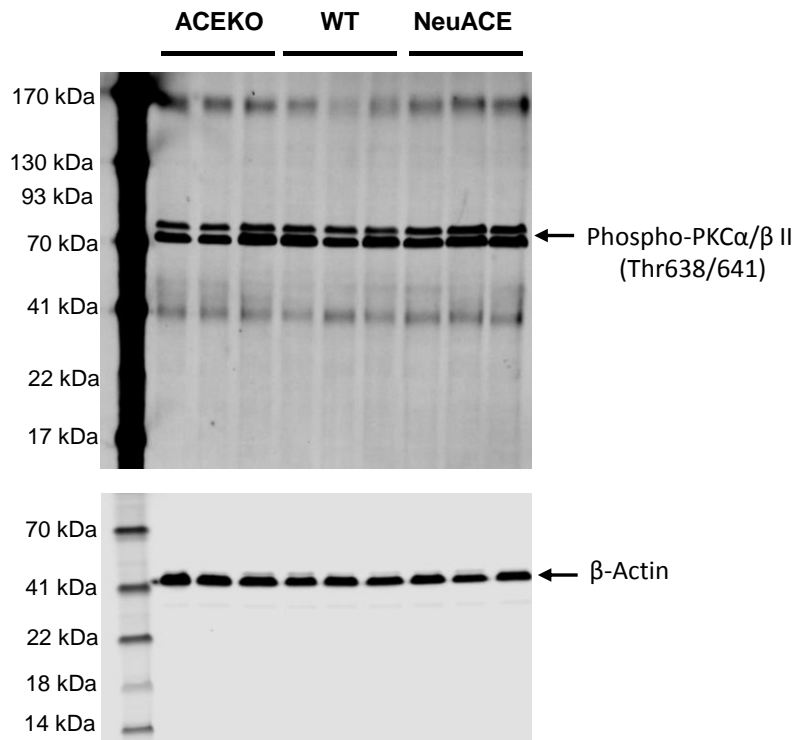

**Fig. S2. Western blot analysis of phospho-PKCα/β II.** Bone marrow-derived neutrophils were stimulated with 1μg/ml LPS for 30 minutes, lysed, and presence of phospho-PKCα/β II was evaluated.

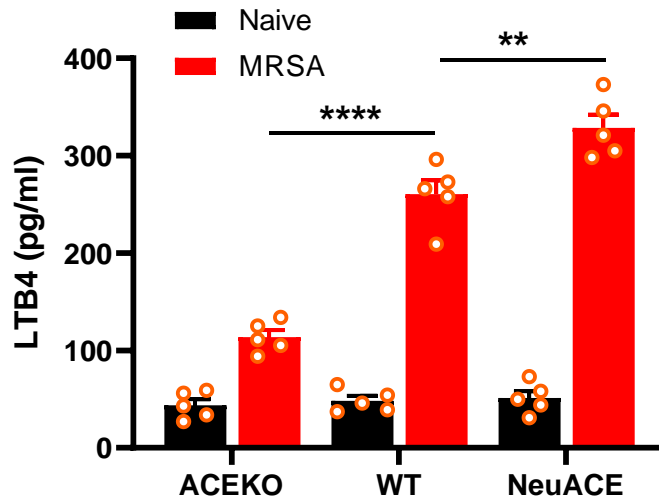

**Fig. S3. In vitro exposure to MRSA induces LTB4 production by neutrophils.** Bone marrow-derived neutrophils were challenged with MRSA at an MOI of 15 and, after 6 hours, LTB4 was measured in the supernatant by ELISA. Data were analyzed by using two-way ANOVA with Bonferroni's correction for multiple comparisons and presented as  $\pm$  SEM (n=5). \*\* $p < 0.01$ , \*\*\*\* $p < 0.0001$ .

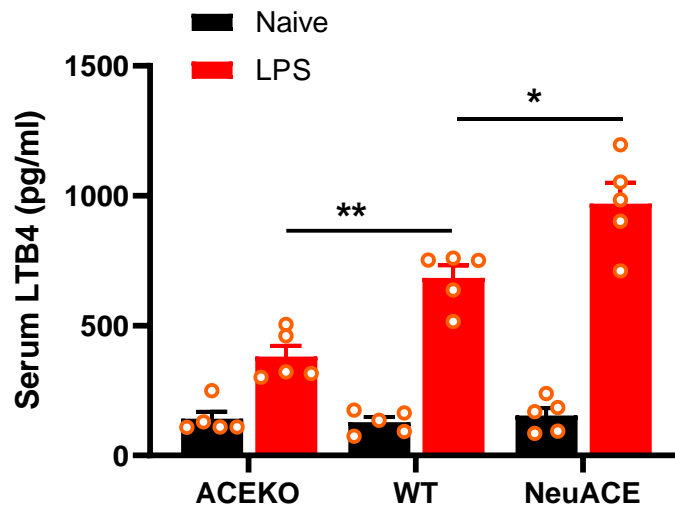

**Fig. S4. LPS challenge increases serum LTB4.** Mice were challenged i.p. with LPS (750  $\mu$ g/Kg body weight) and, after 4 hours, blood was collected for analysis of LTB4 concentration in the serum. Data were analyzed using a two-way ANOVA with Bonferroni's correction for multiple comparisons and presented as  $\pm$  SEM (n=5 mice per group). \* $p < 0.05$ , \*\* $p < 0.01$

**A**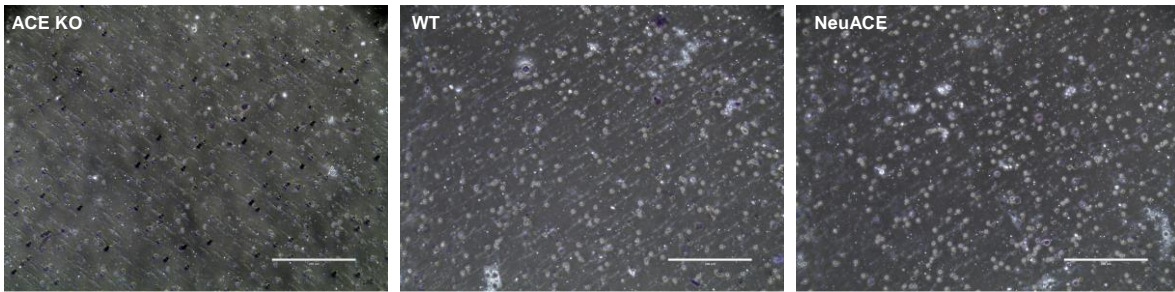**B**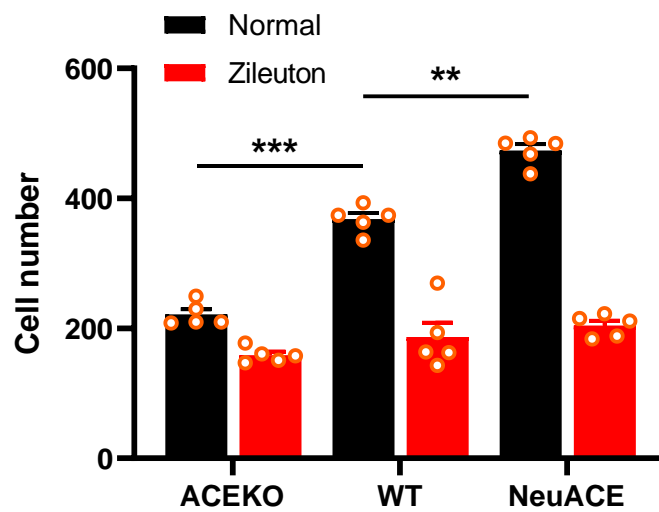

**Fig. S5. Measurement of neutrophil chemotaxis.** Neutrophils from ACE KO, WT and NeuACE mice were exposed to fMLP in a transwell chemotaxis assay, with or without 100  $\mu$ M zileuton treatment. The cells that migrated from the upper insert surface to the lower surface were imaged and counted. **(A)** Representative images of the lower transwell membrane without zileuton for cell counting. Scale bar, 200  $\mu$ m. **(B)** A graph shows the average number of cells per image. A two-way ANOVA with Bonferroni's correction for multiple comparisons was used to analyze group comparisons and data presented as  $\pm$  SEM (n=5). \*\*p<0.01, \*\*\*p<0.001.

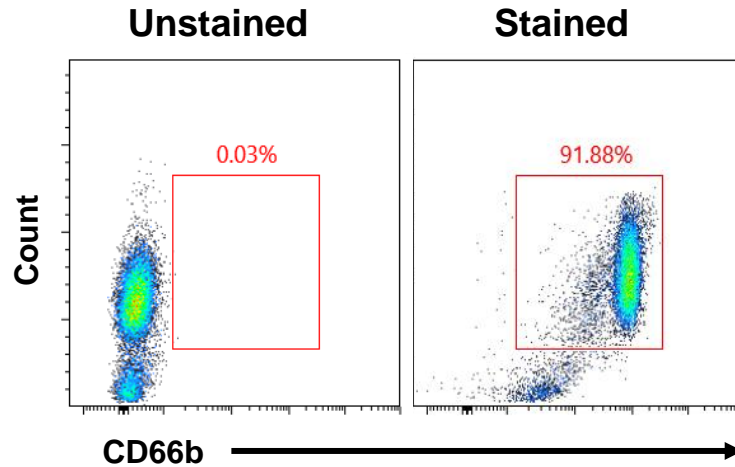

**Fig. S6. Purity of human neutrophils by flow cytometry.** Neutrophils were isolated from whole human blood and purity was determined by flow cytometry. Neutrophils are defined as CD66b<sup>+</sup>.

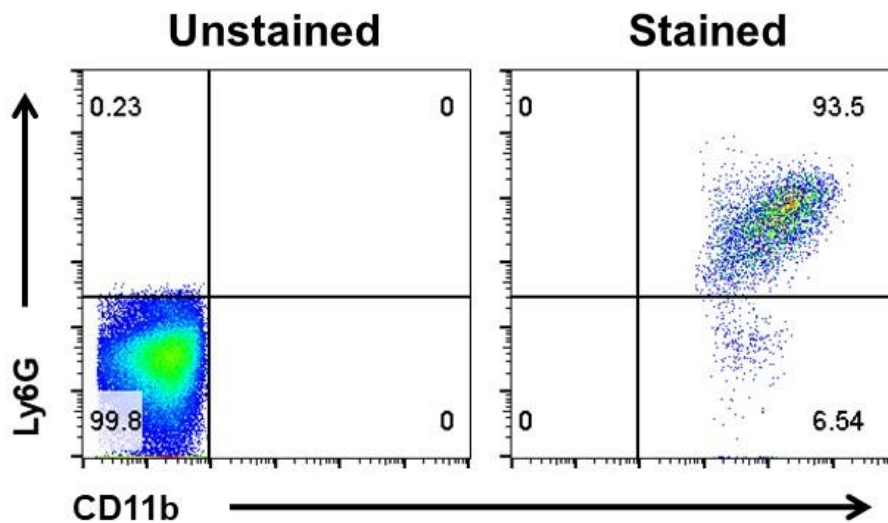

**Figure S7. Purity of neutrophils.** Neutrophils were isolated from mice bone marrow with STEMCELL Mouse Neutrophil Isolation Kit and purity was determined with flow cytometry. Neutrophils are defined as Ly6G<sup>+</sup>CD11b<sup>+</sup>.

**A**

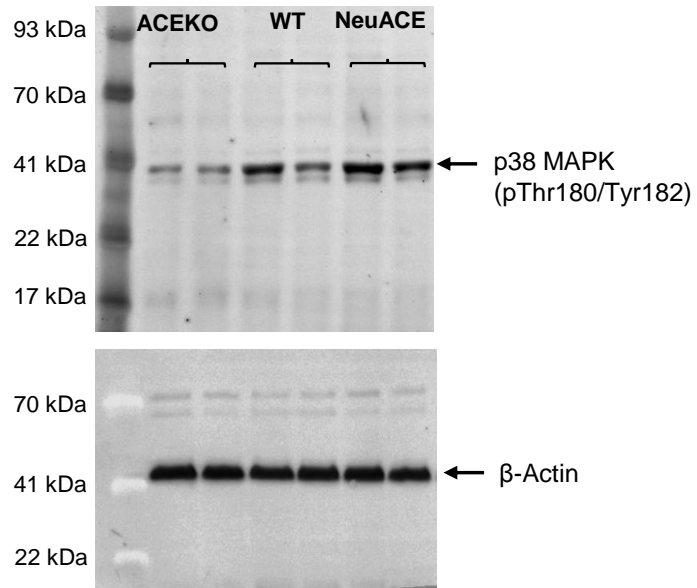

**B**

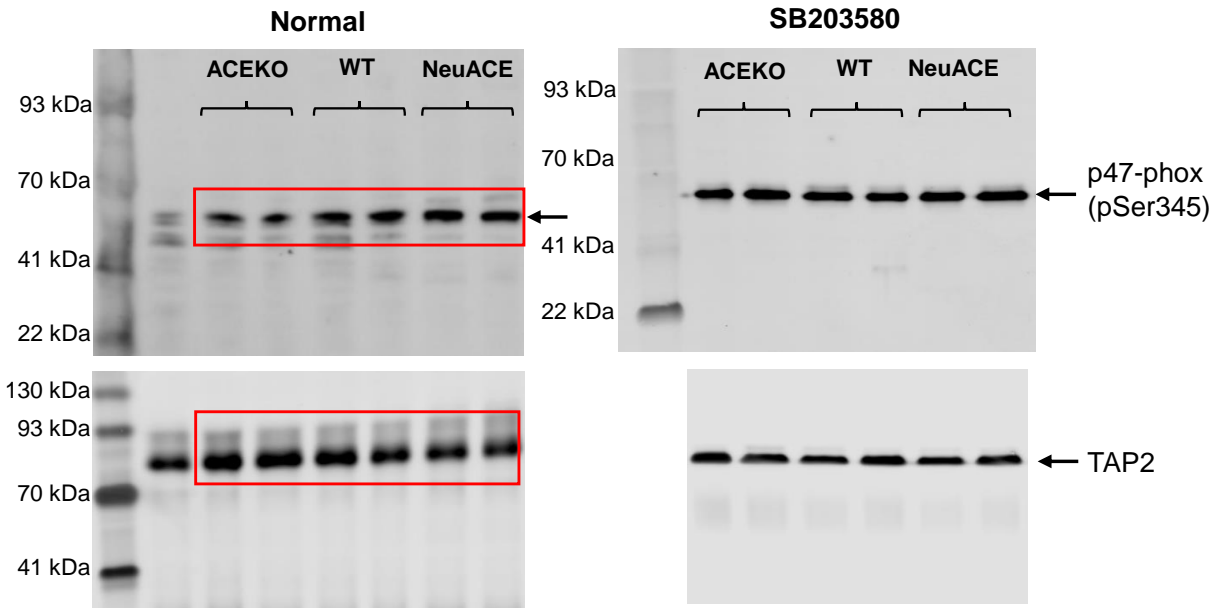

**C**

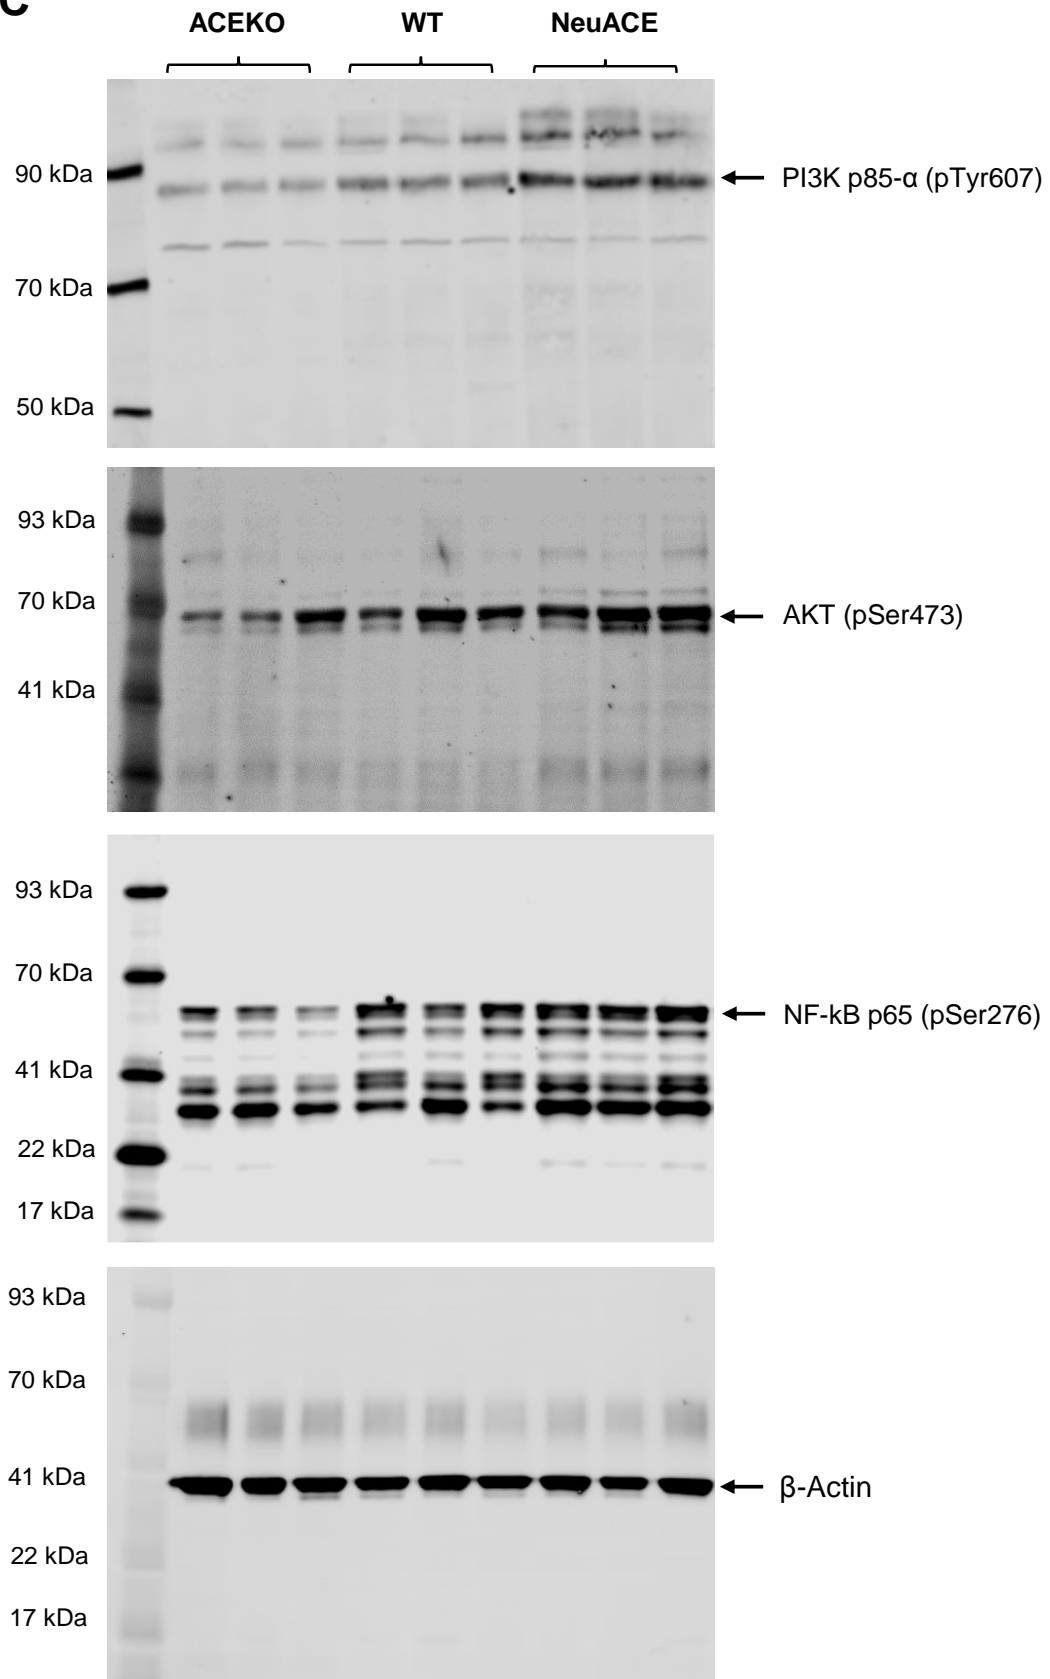

**D**

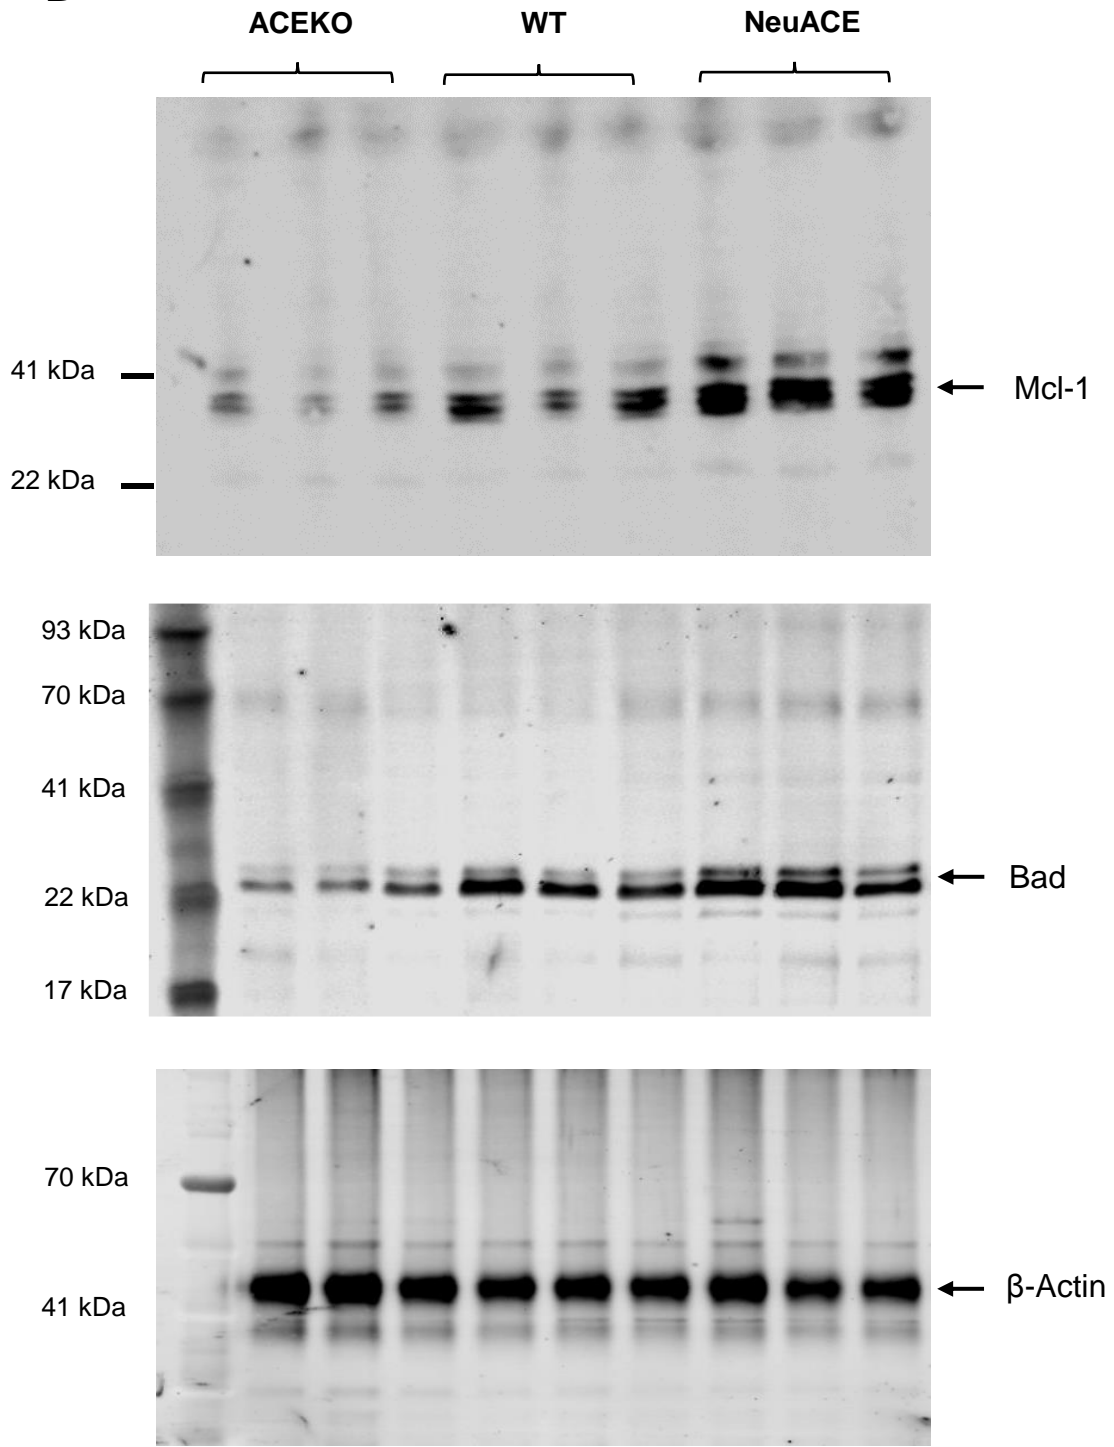



**F**

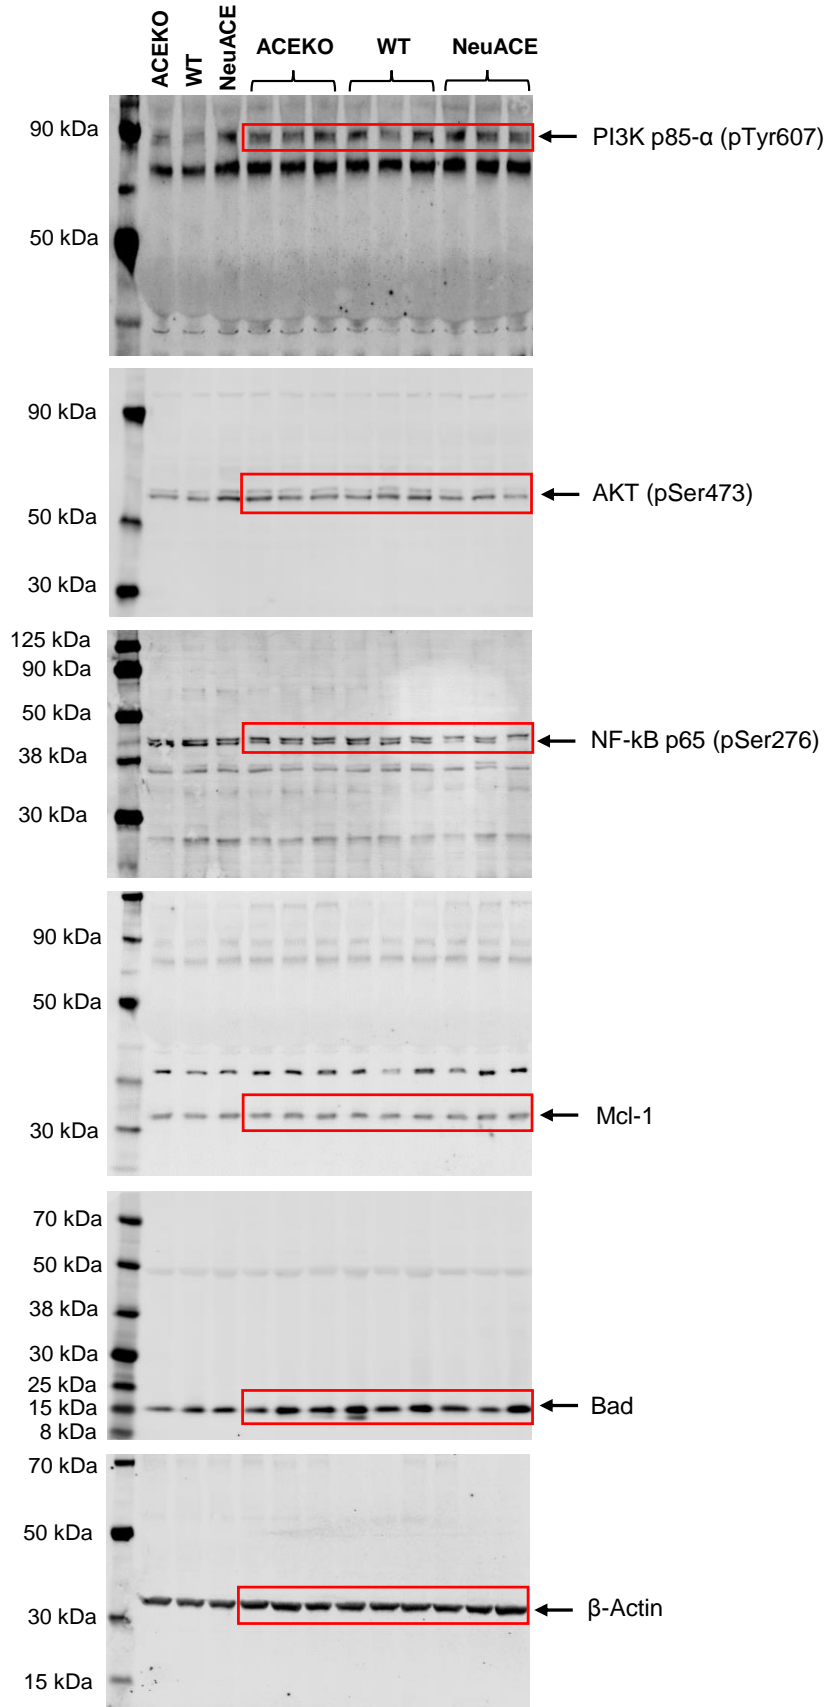

**F**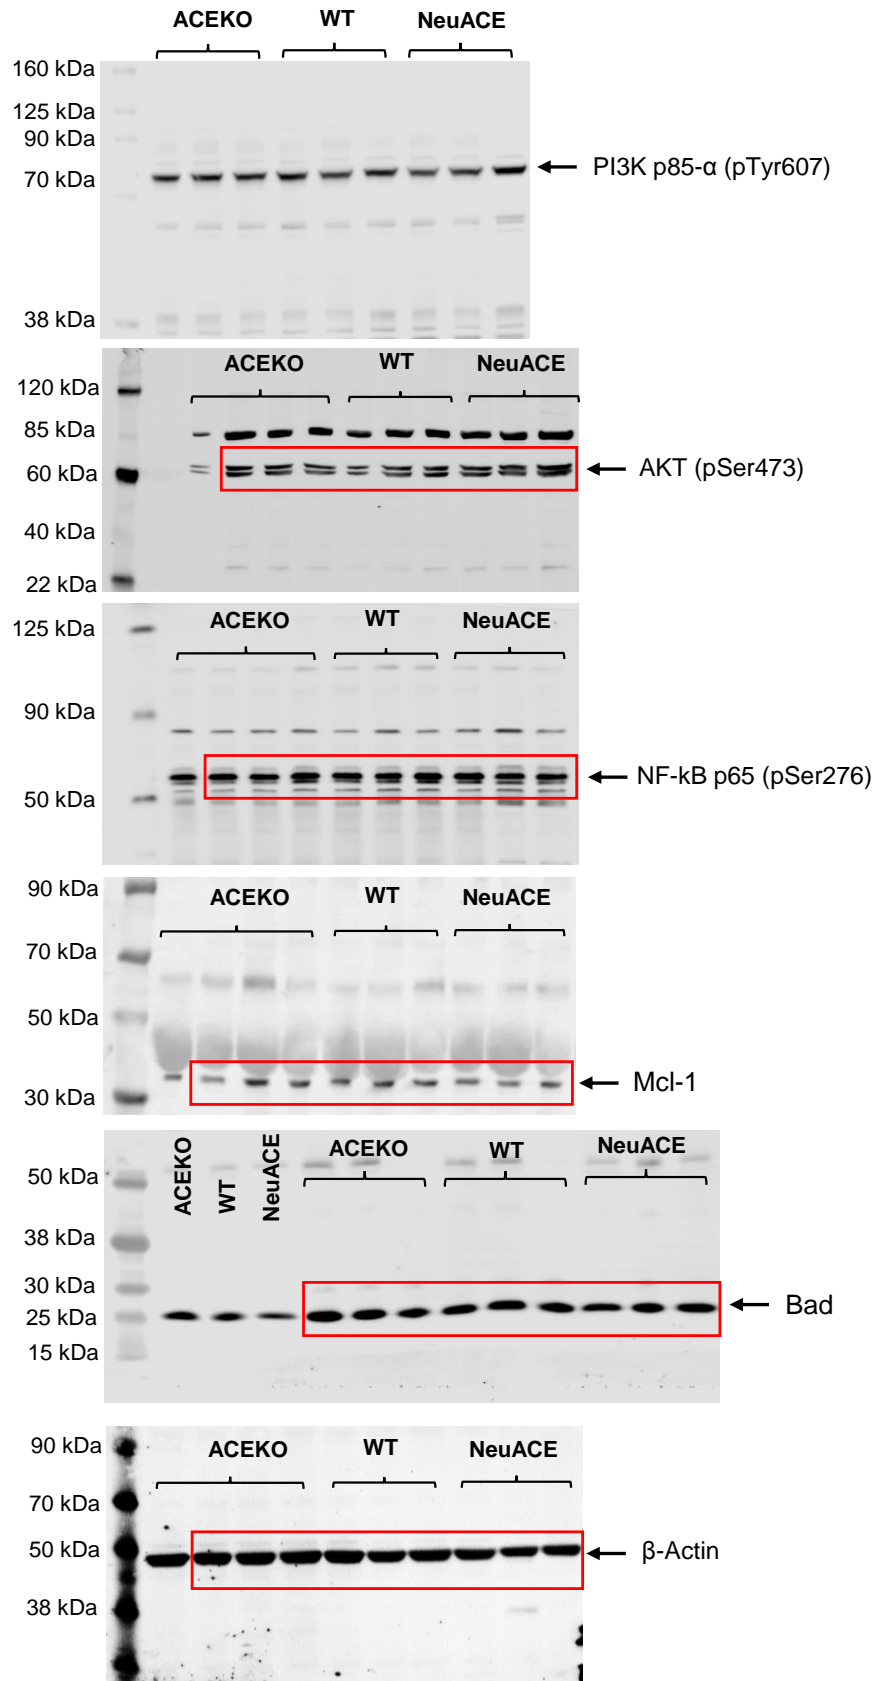

**Fig. S8. All original uncropped western blots. (A)** Phospho-p38-MAPK (Fig. 4C). **(B)** Phospho-p47-phox (Fig. 4E). **(C)** Phospho-PI3K, phospho-AKT, and phospho-NF-kB p65 (Fig. 7B). **(D)** Mcl-1 and Bad (Fig. 7C). **(E)** Western blot analyses with ramipril treatment: phospho-PI3K, phospho-AKT, phospho-NF-kB p65, Mcl-1, and Bad (Fig. 7D). **(F)** Western blot analyses with LTB4 inhibition: phospho-PI3K, phospho-AKT, phospho-NF-kB p65, Mcl-1, and Bad (Fig. 7E).

**Table S1. Details of human volunteers.**

| <b>Volunteer</b>      | <b>#1</b> | <b>#2</b> | <b>#3</b> | <b>#4</b>  | <b>#5</b> | <b>#6</b>            | <b>#7</b>     |
|-----------------------|-----------|-----------|-----------|------------|-----------|----------------------|---------------|
| <b>Age</b>            | 69 years  | 46 years  | 40 years  | 31 years   | 34 years  | 52 years             | 39 years      |
| <b>Sex</b>            | M         | M         | M         | M          | M         | M                    | M             |
| <b>Ethnicity</b>      | Caucasian | Caucasian | Caucasian | Asian      | Asian     | Asian                | Caucasian     |
| <b>Blood Pressure</b> | 125/73    | 128/71    | 131/83    | 128/76     | 110/64    | 124/83               | 116/71        |
| <b>Disease</b>        | None      | None      | None      | None       | None      | Type 2 diabetes      | None          |
| <b>Medications</b>    | None      | None      | None      | Vitamin D2 | Zinc      | Metformin<br>Lipitor | Levothyroxine |

**Table S2. Global statistical analyses of bacterial killing during incubation with whole blood isolated from humans treated with ramipril.** Significant differences were observed in the percent survival of bacteria based on ramipril treatment ( $p < 0.0001$ ) and by bacterial strain ( $p < 0.0001$ ; *P. aeruginosa* has the overall highest percent survival). There was no difference in the percent bacterial survival by the interaction term of bacterial strain and treatment ( $p = 0.1181$ ) suggesting the effect of ramipril on bacteria killing was similar across all three strains. Globally, there was no difference either between 2 hour and 5 hour timepoints in the assay ( $p = 0.2232$ ).

| Global Testing: Type 3 Tests of Fixed Effects |         |
|-----------------------------------------------|---------|
| Effect                                        | p-value |
| Bacteria                                      | <.0001  |
| Treatment                                     | <.0001  |
| Time                                          | 0.2232  |
| Bacteria*Treatment                            | 0.1181  |
| Bacteria*Time                                 | <.0001  |
| Time*Treatment                                | 0.4571  |

**Table S3. Pairwise statistical analyses of bacterial killing during incubation with whole blood isolated from humans treated with ramipril.** Within each bacterial killing assay, the effects of ramipril (R) on whole blood-mediated killing were significantly different from untreated (U) or the washout (W) phase except at the 5 hour time point for *P. aeruginosa*.

| Differences between treatments |                      |
|--------------------------------|----------------------|
| Label                          | Bonferroni (p-value) |
| MRSA 2h RvU                    | 0.0006               |
| MRSA 2h RvW                    | 0.0192               |
| MRSA 5h RvU                    | 0.0006               |
| MRSA 5h RvW                    | 0.0060               |
| Kleb 2h RvU                    | 0.0360               |
| Kleb 2h RvW                    | 0.0024               |
| Kleb 5h RvU                    | 0.0006               |
| Kleb 5h RvW                    | 0.0006               |
| Pseu 2h RvU                    | 0.0012               |
| Pseu 2h RvW                    | 0.0036               |
| Pseu 5h RvU                    | 0.3672               |
| Pseu 5h RvW                    | 1.0000               |

**Table S4. Global statistical analyses of intracellular killing by human neutrophils in vitro.**

Differences were observed in the percent survival of bacteria exposed to neutrophils isolated from humans receiving ramipril treatment ( $p < 0.0001$ ) and by bacterial strain ( $p = 0.0010$ ; *P. aeruginosa* has the overall highest percent survival) and by time ( $p < 0.0001$ ; 2 hours had higher percent survival than 5 hours overall). There was no difference for the interaction of bacterial strain with treatment ( $p = 0.0916$ ) suggesting the response to ramipril is similar across all three strains.

| Global Testing: Type 3 Tests of Fixed Effects |         |
|-----------------------------------------------|---------|
| Effect                                        | p-value |
| Bacteria                                      | 0.0010  |
| Treatment                                     | <.0001  |
| Time                                          | <.0001  |
| Bacteria*Treatment                            | 0.0916  |
| Bacteria*Time                                 | 0.4756  |
| Time*Treatment                                | 0.0047  |

**Table S5. Pairwise statistical analyses of intracellular killing by human neutrophils in vitro.** Within each bacterial killing assay, the reduced killing of neutrophils following ramipril (R) exposure was significantly different from untreated (U) or the washout (W) phase except in *P. aeruginosa* groups at the 2 hour timepoint.

| Pairwise testing: Differences between Treatments |                      |
|--------------------------------------------------|----------------------|
| Label                                            | p-value (Bonferroni) |
| MRSA 2h RvU                                      | 0.0006               |
| MRSA 2h RvW                                      | 0.0024               |
| MRSA 5h RvU                                      | 0.0006               |
| MRSA 5h RvW                                      | 0.0006               |
| Kleb 2h RvU                                      | 0.0006               |
| Kleb 2h RvW                                      | 0.0480               |
| Kleb 5h RvU                                      | 0.0006               |
| Kleb 5h RvW                                      | 0.0006               |
| Pseu 2h RvU                                      | 0.1620               |
| Pseu 2h RvW                                      | 0.2688               |
| Pseu 5h RvU                                      | 0.0012               |
| Pseu 5h RvW                                      | 0.0006               |
